# Supplementary material for: Factors Influencing Primary Care Physicians’ Prescribing Behavior of Anticoagulant Therapy for the Management of Patients With Non-valvular Atrial Fibrillation in the Community: a Qualitative Research Study
Source: Research Square preprint supplement (doi:10.21203/rs.3.rs-145073/v1), 2021-01-18
Supplement: Supplementary file 1 [file 8023651f6bf014ab691713ea.docx]

**Factors influencing primary care physicians’ prescribing behavior of anticoagulant therapy for the management of patients with non-valvular atrial fibrillation in the community: A Qualitative Research Study**

Shera Chaterji1, Lay Geok Lian1, Lee Ting Yee1, Chua Liwei1, Wee Yi-Mei Sabrina1,2, Yap Sui Ling1, K Dhana Letchimy1, Ngiap Chuan Tan1,2

1 SingHealth Polyclinics, Singapore

2 SingHealth-Duke NUS Family Medicine Academic Clinical Programme, Singapore

**Appendix 1: Topic Guide**

| **Questions** | **Domains** |
| --- | --- |
| 1. Tell me how you manage patients with AF. | Clinician, disease and treatment, healthcare system and policy. |
| 2. Tell me more about your experience with warfarin. | Clinician, disease and treatment. |
| 3. Tell me more about your experience with NOACs. | Clinician, disease and treatment. |
| 4. What are your considerations while choosing anticoagulants in patients with AF? | Patient, disease and treatment, healthcare system and policy. |

*A separate question on the proposed patient decision-support aid on anticoagulant therapy for AF is presented in a separate publication.
